# Supplementary material
Source: PubMed Central journal article supplement (PMC7002190)
Supplement: NIHMS1545023-supplement-1.pdf [file NIHMS1545023-supplement-1.pdf]

1 **Single-cell gene expression analyses reveal distinct self-renewing and**  
2 **proliferating subsets in the leukemia stem cell compartment in acute**  
3 **myeloid leukemia**

4  
5 **Supplementary Materials**

6  
7 Supplementary Materials and Methods

8 Supplementary Fig. S1. Experimental Workflow

9 Supplementary Fig. S2. Cell surface markers delineate LSC subgroups

10 Supplementary Fig. S3. HSPC markers in the murine data and *Cd69* and *Cd36*  
11 are expressed in different stages of early hematopoiesis

12 Supplementary Fig. S4. Primary human AML stem and progenitor cells  
13 recapitulate features of the single-cell gene expression patterns of murine *Mll-*  
14 *AF9/NRAS<sup>G12V</sup>* AML

15 Supplementary Fig S5. Sorting strategy for murine AML for *in vivo* leukemia  
16 reconstitution assays and *in vitro* colony forming assays.

17 Supplementary Fig S6. Post-sort assessments.

18 Supplementary Fig S7. The viability of leukemic subpopulations and  
19 immunophenotype of transplanted leukemias.

20 Supplementary Fig S8. CD36 and CD69 expression in human AML  
21 subpopulations.

22

23

24 Table S1. The murine LSC single-cell differentially expressed gene list. Genes  
25 differentially expressed between Group 1 and Group 3 cells.

26 Table S2. Ingenuity Pathway Analysis of genes differentially expressed between  
27 Group 1 and Group 3 single-cell gene expression profiles

28 Table S3. Clinical characteristics of human samples

29 Table S4. Mutational profiles of human samples

30 Table S5. Single-cell qPCR gene panel

31 Table S6. Single-cell qPCR measured, passed quality control, and enriched  
32 genes.

33 Table S7. Mutant genes NGS panel

34

## 35 **Supplementary Materials and Methods**

36

37

### 38 **Single-Cell Capture**

39 Primary murine *NRAS*<sup>G12V</sup>/*Mll-AF9* AMLs were harvested from spleens of  
40 leukemic mice, stained with antibodies for cell surface markers, and sorted on a  
41 FACSAria (Becton Dickinson, Franklin Lakes, NJ). Cryopreserved bone marrow  
42 aspirates from healthy volunteers were purchased from Lonza (Basel,  
43 Switzerland). AML samples with >50% bone marrow blasts were obtained from  
44 the University of Minnesota Hematological Malignancies Tissue Bank in

45 accordance with the University of Minnesota Institutional Review Board (IRB  
46 #1506E72802 and #0611M96846).

47 Fresh AML bone marrow aspirates were CD34-selected using EasySep  
48 Magnet and EasySep Human CD34 antibody kit (StemCell Technologies,  
49 Vancouver, BC, Canada). Human AML and normal bone marrow samples were  
50 sorted to isolate CD34<sup>+</sup>CD38<sup>-</sup> cells. Sorted or magnet-selected cells were stained  
51 with a Live/Dead Viability and Cytotoxicity dye (Life Technologies, Carlsbad,  
52 California, # L-3224) and loaded at 250 cells/ $\mu$ l for single-cell capture on the C<sub>1</sub>  
53 Single-Cell Auto Prep Integrated Fluidic Circuit for small cells (5-10  $\mu$ m, Fluidigm,  
54 South San Francisco, California). Captured cells were imaged to identify single,  
55 live cells for cDNA preparation. SMARTer Ultra Low RNA Kit for the Fluidigm C<sub>1</sub>  
56 System (Takara Bio, Kusatsu, Shiga Prefecture, Japan) was used to prepare  
57 cDNA for sequencing. Fluidigm Reverse Transcription Master mix was used to  
58 prepare cDNA for PCR.

59

### 60 **Single-cell RNA sequencing data processing**

61 Nextera libraries were generated from the single cell cDNA using Nextera  
62 XT DNA Sample Preparation Kit and Nextera XT DNA Library Preparation Index  
63 Kit (Illumina). cDNA was quantified using a Quant-IT™ PicoGreen® dsDNA  
64 Assay Kit (Thermo Fischer Scientific). The libraries were sequenced on an  
65 Illumina HiSeq2500 (100 bp, paired-end reads, minimum 1 million reads/cell). For  
66 each cell, per base and per read quality scores were checked, and FastqQC  
67 (version 0.11.2, <http://www.bioinformatics.babraham.ac.uk/projects/fastqc/>) was

68 performed. Sequence adaptors and low-quality sequence were removed using  
69 Trimmomatic (v0.32). Trimmed reads were mapped with TOPHAT 2.0 (v2.0.10)  
70 to the mouse reference genome (UCSC GRCm38/mm10 assembly). An  
71 additional chromosome was added to the reference genome that contained the  
72 transgenes that were expressed in the mouse model (*NRAS<sup>G12V</sup>*, *MLL-AF9* and  
73 *EGFP*)<sup>1</sup>. Insertion size metrics were calculated for each sample using Picard  
74 software (version 1.126, <http://picard.sourceforge.net>). Samtools software  
75 (version 1.0\_BCFTTools\_HTSLib)<sup>2</sup> was used to sort and index the bam files.  
76 Cuffquant (Cufflinks version 2.2.1)<sup>3</sup> was used to generate transcript abundance  
77 files (options used include the multi-read-correct). Murine cells with less than  
78 75% alignment to the genome were omitted from further analysis. Each cell  
79 expressed a minimum of 1,300 genes. There were 42, 33, and 51 evaluable cells  
80 in the discovery data set, validation dataset, and Ras-off dataset, respectively.  
81 Human cells were analyzed to omit outliers per SINGuLAR Analysis Toolkit  
82 (Fluidigm). This approach identifies cells whose expression of the most  
83 commonly expressed genes exceeds the 15<sup>th</sup> percentile; cells that meet this  
84 criterion are included in the analysis, the remaining cells are omitted as outliers.  
85 In the human dataset, 25 cells were included in the analysis. After mapping and  
86 abundance estimates were completed, Cuffnorm (Cufflinks version 2.2.1)<sup>3</sup> was  
87 used to generate fragments per kilobase of transcript per million mapped reads  
88 (FPKM) values.

89

## 90 **Single-cell quantitative reverse transcriptase PCR**

91 A 96-gene Delta Gene™ assay (Fluidigm, South San Francisco,  
92 California) was designed to represent genes that were differentially expressed in  
93 the murine single-cell RNA sequencing data from the validation dataset (one of  
94 the Ras-On LSC datasets) and include housekeeping genes (Supplementary  
95 Table S5). This gene list was derived from the list of genes that were differentially  
96 regulated (with a fold change of  $\geq 2.0$  and p value  $\leq 0.05$ ) between (CD69<sup>High</sup>)  
97 Group 1 and (CD36<sup>High</sup>) Group 3 cells in the validation dataset (Supplementary  
98 Table S1). This gene list chosen based on magnitude of the fold change  
99 difference and pattern of expression in the murine dataset and was adjusted after  
100 the first single-cell capture and qPCR experiment to remove genes that were not  
101 amplified, include new genes to replace omitted genes, and replace primers for  
102 *CD36* and *CD69* to improve performance. Delta Gene™ assay primers were  
103 designed with the following parameters: T<sub>m</sub> 56-62°C, optimal 59°C; GC content  
104 close to 50%; last 5 bases with 2 to 4 Gs or Cs, last base with a G or C (3' end);  
105 span a lengthy intron (greater than 1000bp) or overlap an exon-exon boundary;  
106 T<sub>m</sub> (melting temperature) within 5 degrees C, typically in the 58 to 60 degrees C  
107 range; primer length 18-21bp; and ideal amplicon length less than 200bp.  
108 Primers sequences were compared to the mouse genome to ensure there were  
109 no significant off-target products. On-chip quantitative PCR was performed using  
110 96.96 IFCs on the BioMark HD system (Fluidigm) according to manufacturer's  
111 instructions. Raw gene expression data was provided as threshold cycle (C<sub>t</sub>)  
112 values.

113

114 **Data processing, quality control, and normalization of single-cell**  
115 **quantitative reverse-transcriptase PCR data**

116 Single-cell qPCR reactions were performed on the Biomark. Calibration  
117 controls were reviewed to ensure consistent loading and amplification across  
118 well. Genes with multiple melting curves, indicating non-specific amplification,  
119 were removed from analysis for each project. The genes that were omitted after  
120 quality control varied for each patient sample. Therefore, the list of genes that  
121 passed quality control and were accurately measured varied from sample to  
122 sample, they are listed in Supplementary Table S6.

123 After quality control, the data was normalized to account for variations in  
124 signal magnitude between cells. To avoid the potential pitfall of over- or under-  
125 correcting expression values, we performed a rank normalization by assigning  
126 each gene a rank according to its relative expression within a cell. To avoid  
127 amplifying slight differences in expression, we used rounded values such that  
128 genes with almost identical expression were assigned the same rank. The  
129 highest rank value was set to the number of genes measured in the cell. These  
130 rank values were then z-scored by subtracting the gene's mean rank value within  
131 a sample from the gene's rank in that sample and dividing this difference by the  
132 standard deviation of that gene within the sample.

133

134

135 **Mutational Profiling**

136 An aliquot from each sorted and bulk human AML and healthy bone  
137 marrow aspirate was submitted for next-generation sequencing analysis using a  
138 clinically validated, hematological malignancy-focused 70-gene assay  
139 (Supplementary Table S7). DNA was extracted with Qiagen QIAamp Blood Mini  
140 Kit (Qiagen, Redwood City, California), and libraries were prepared following  
141 Nextera-based TruSight One library preparation (Illumina, San Diego, California).  
142 Libraries were enriched for genes of interest using IDT xGen Lockdown baits  
143 (Integrated DNA Technologies, Coralville, IA) designed to cover all coding  
144 regions for the 70 genes. Paired-end (2x225) sequencing was performed on a  
145 MiSeq (Illumina) to an average minimum coverage of >300x. A custom script was  
146 used to process the data and call variants. Briefly, adapter and quality trimming  
147 were performed with Cutadapt (version 1.8.1); overlapping paired-reads were  
148 merged with PandaSeq (version 2.7); alignment was performed with BWA  
149 (version 0.7.12); and variants were called using Freebayes (version v0.9.10-3-  
150 g47a713e-dirty). Variants were analyzed and annotated using wANNOVAR  
151 (wannovar.wglab.org) and manually interpreted.

152

### 153 **Data and material availability**

154 All gene expression datasets are available on the Gene Expression Omnibus  
155 (<https://www.ncbi.nlm.nih.gov/geo/>), accession number GSE140896.

156

### 157 **Statistical Analysis**

158 In addition to the statistical tests used for gene expression analysis,  
159 student's t-test was performed (Prism 7, GraphPad, San Diego, California) to  
160 assess significance in comparing values between two groups. Kaplan-Meier  
161 survival curves (Prism, GraphPad, La Jolla, CA) were used to compare survival  
162 of mouse reconstitution assays.

163

### 164 **Gene Set Enrichment Analysis**

165 Gene set enrichment analysis (GSEA,  
166 <http://www.broadinstitute.org/gsea>)<sup>4,5</sup> was performed by comparing the  
167 normalized gene expression values of Group 1 cells to those of Group 3 cells. All  
168 genes that were not expressed in any of the cells analyzed were removed from  
169 the dataset prior to analysis.

170

### 171 **Mice and leukemia reconstitution assays**

172 Mice were housed in aseptic conditions with autoclaved cages, bedding  
173 material, water, bottles, and irradiated food. Primary murine *NRAS*<sup>G12V</sup>/*MII-AF9*  
174 AMLs<sup>1,6</sup> were maintained by serial transplantation into recipient mice (they were  
175 not passaged *in vitro*). In this model, human *AF9* is fused to the endogenous  
176 murine *Mii*. *NRAS*<sup>G12V</sup> is a human transgene, controlled by a tetracycline  
177 repressible transgene under the control of the murine *Vav1* promoter<sup>1,7</sup>:  
178 treatment with the tetracycline analog, doxycycline, causes loss of *NRAS*<sup>G12V</sup>  
179 expression and leads to disease remission. For leukemia reconstitution assays,  
180 10<sup>4</sup> or 10<sup>5</sup> sorted primary *NRAS*<sup>G12V</sup>/*MII-AF9* leukemia cells were injected via tail



181 vein into SCID/Beige mice<sup>1</sup>. Mice were visually inspected three times per week.  
182 Leukemia development was monitored by weekly retro-orbital eye bleeds and  
183 complete blood counts. Leukemia onset was defined as WBC > 10,000 cells/ $\mu$ L  
184 of peripheral blood. Moribund mice were sacrificed, and their spleens and bone  
185 marrow were harvested for immunophenotypic analysis.

186

### 187 **Colony forming assays**

188 Cryopreserved primary *NRAS*<sup>G12V</sup>/*Mll-AF9* leukemia cells, isolated from  
189 the spleens of leukemic mice, were thawed in a 37°C water bath, washed in  
190 PBS, and plated in Methocult™ M3231 (StemCell Technologies, Vancouver, BC,  
191 Canada) supplemented with 1 ng/ml mGM-CSF, 100 U/ml Penicillin G, and 100  
192 mg/ml streptomycin (Invitrogen, Carlsbad, California). 10,000 leukemia cells were  
193 plated per well at a concentration of 5x10<sup>4</sup> cells/ml. Colony formation was scored  
194 after seven days in culture.

195

### 196 **Fluorescence-based flow cytometry, cell sorting, and cell separation**

197 Primary murine AML cells were stained with a dead cell exclusion dye,  
198 Fixable Viability Dye eFluor™450 (eBioscience, San Diego, California), then  
199 incubated in Fc block (mouse-specific anti-CD16/CD32 antibody, BD  
200 Pharmingen, San Jose, California) diluted 1:200 in FACS buffer (PBS/2% FBS),  
201 and incubated in conjugated primary antibodies for 1 hour. Mouse-specific cell-  
202 surface protein antibodies were purchased from BD Pharmingen and were  
203 specific for: Mac-1-PerCP5.5 ( 1:12,800, M1/70), c-Kit-BV786 (1:200, 2B8), Sca-

204 1-PE (1:50, E13-161.7), CD36-BB515 (1:400, CRF-2712), and CD69-PE-Cy7  
205 (1:400, H1.2F3).

206 Cryopreserved primary human bone marrow aspirates from patients with  
207 AML or healthy volunteers were thawed at 37°C. A freshly obtained human AML  
208 bone marrow specimen and thawed bone marrow specimens were subject to  
209 mononuclear cell isolation using Lymphoprep™ (Stemcell Technologies),  
210 washed, stained with Fixable Viability Dye eFluor™450 (eBioscience), incubated  
211 with Fc block (human-specific anti-CD16/CD32 antibody, BD Pharmingen) diluted  
212 1:200 in FACS buffer (PBS/2% FBS), and incubated in conjugated primary  
213 antibodies for 1 hour. Human-specific cell-surface protein included CD34-APC  
214 (1:200, 581) and CD38-FITC (1:200, HB7) (BD Pharmingen). Cells were  
215 analyzed on a FACSCalibur or LSRII flow cytometer or sorted on a FACS Aria II  
216 (Becton Dickinson, Franklin Lakes, NJ) using CellQuest Pro software.  
217 CD34+CD38- isolation of primary human AML or normal bone marrow cells was  
218 performed by sorting on a FACS Aria II. CD34+ isolation was performed by  
219 EasySep Magnet and EasySep Human CD34 antibody kit and CD34-conjugated  
220 beads (StemCell Technologies).

221

## 222 **Mass cytometry (CyTOF)**

223 Cryopreserved primary human bone marrow aspirates obtained at  
224 diagnosis from patients with AML were thawed at 37°C. Bone marrow  
225 mononuclear cells (BMMCs) were isolated using Lymphoprep™ (Stemcell  
226 Technologies). BMMCs were incubated for 30 minutes at 37°C in a medium of RPMI  
227 1640 (Gibco, Billings, MT) with 10% fetal bovine serum and 1% penicillin/streptomycin

228 (RPMI10). Cells were washed in phosphate buffered saline (PBS), treated with cisplatin  
229 dead-cell exclusion reagent for mass cytometry (Fluidigm, San Francisco, CA), blocked  
230 with Human Fc block (BD Pharmingen, San Diego, CA), and stained for cell surface  
231 markers (with metal-conjugated antibodies to human proteins CD34-148Nd (581), CD38-  
232 172Yb (HIT2), CD69-162Dy (FN50), and CD36-152Sm (5-271)). Stained cells were fixed  
233 in 1.6% paraformaldehyde (Electron Microscopy Sciences, Hatfield, PA), permeabilized  
234 in cold methanol, and stored at -80°C. Permeabilized cells were stained with anti-Ki67  
235 antibody (Ki-67, conjugated to 168Er) and intercalated with IdU (a DNA intercalator used  
236 for single-cell recognition in mass cytometry data). Samples were analyzed with a  
237 CyTOF2 mass cytometer (Fluidigm, San Francisco, CA). All antibodies and reagents for  
238 mass cytometry were purchased from Fluidigm.

239

#### 240 ***In vivo* proliferation assays (CellTrace)**

241 Primary leukemia cells were labeled with CellTrace Far Red Kit (Thermo  
242 Scientific, Waltham, MA) according to the manufacturer's instructions at 1 nM of  
243 CellTrace for 20 minutes at 37°C.  $10^7$  CellTrace-labeled cells were transplanted  
244 via tail vein into SCID/Beige mice<sup>1</sup>. The spleens of leukemic mice were harvested  
245 14 days after transplant and stained with cell surface markers. Levels of  
246 CellTrace Far Red were assessed by fluorescence-based flow cytometry on the  
247 day of harvest.

248

#### 249 **Analysis of previously published single-cell RNA sequencing data**

250 We assessed the expression of our murine LSC single-cell gene  
251 expression profile in a recently published dataset of normal human bone marrow

252 single-cell transcriptional data. Single-cell RNA Sequencing data from 25 normal  
253 human bone marrow samples was obtained from Oetjen, 2018<sup>8</sup>. Cells expressing  
254 *CD34* (values >0) and not expressing *CD38* (values ≤1) in this dataset were  
255 included for analysis. Samples with fewer than ten CD34+CD38- cells were  
256 eliminated from this analysis. All remaining CD34+CD38- cells were pooled. The  
257 expression of the murine LSC single-cell gene expression profile was assessed  
258 in this dataset. Genes expressed in fewer than 25% of the pooled cells were  
259 omitted from analysis. Expression data was transformed with the log-like  
260 hyperbolic arcsine ( $\text{asinh}(\text{data}/5)$ ), normalized by dividing each cell's value by the  
261 cell mean, and genes were mean centered by subtracting the gene mean from  
262 each gene value. Pooled data were clustered using hierarchical agglomerative  
263 clustering using the clustergram function in MATLAB (Mathworks Inc) with the  
264 cosine distance function.

265       Significance assessment for enrichment was calculated using a  
266 hypergeometric test: in each cluster the number of Group 1 genes selected out of  
267 the total number of Group 1 genes measured in that dataset. In a total population  
268 size of all genes present in the dataset and number of trials equal to the size of  
269 the cluster. The same analysis was repeated for Group 3 genes in each cluster.  
270

271 **Supplementary Material References**

272

- 273 1. Kim WI, Matise I, Diers MD, Largaespada DA. RAS oncogene  
274 suppression induces apoptosis followed by more differentiated and less  
275 myelosuppressive disease upon relapse of acute myeloid leukemia. *Blood*  
276 2009;113:1086-96.
- 277 2. Li B, Dewey CN. RSEM: accurate transcript quantification from RNA-Seq  
278 data with or without a reference genome. *BMC bioinformatics* 2011;12:323.
- 279 3. Trapnell C, Roberts A, Goff L, et al. Differential gene and transcript  
280 expression analysis of RNA-seq experiments with TopHat and Cufflinks. *Nature*  
281 *protocols* 2012;7:562-78.
- 282 4. Mootha VK, Lindgren CM, Eriksson KF, et al. PGC-1alpha-responsive  
283 genes involved in oxidative phosphorylation are coordinately downregulated in  
284 human diabetes. *Nature genetics* 2003;34:267-73.
- 285 5. Subramanian A, Tamayo P, Mootha VK, et al. Gene set enrichment  
286 analysis: a knowledge-based approach for interpreting genome-wide expression  
287 profiles. *Proceedings of the National Academy of Sciences of the United States*  
288 *of America* 2005;102:15545-50.
- 289 6. Sachs Z, LaRue RS, Nguyen HT, et al. NRASG12V oncogene facilitates  
290 self-renewal in a murine model of acute myelogenous leukemia. *Blood*  
291 2014;124:3274-83.

- 292 7. Wiesner SM, Jones JM, Hasz DE, Largaespada DA. Repressible  
293 transgenic model of NRAS oncogene-driven mast cell disease in the mouse.  
294 Blood 2005;106:1054-62.
- 295 8. Oetjen KA, Lindblad KE, Goswami M, et al. Human bone marrow  
296 assessment by single-cell RNA sequencing, mass cytometry, and flow cytometry.  
297 JCI Insight 2018;3.
- 298
- 299
- 300
- 301

301 **Supplementary Figure Legends**

302 **Supplementary Figure S1.** Experimental Workflow. **A,** Primary murine *Mll-*

303 *AF9/NRAS<sup>G12V</sup>* leukemia cells were used to identify the single-cell gene

304 expression profile of self-renewal and in functional assays to validate this profile.

305 **1.** The LSC-enriched compartment (*Mac1<sup>Low</sup>Kit<sup>+</sup>Sca1<sup>+</sup>*, “MKS”) was isolated by

306 sorting and submitted for single cell capture and RNA sequencing. **2.** The LSC-

307 enriched compartment was further sorted based on CD36 and CD69 status and

308 transplanted into secondary recipients and plated in colony forming assays. **3.**

309 Leukemia cells were labeled with CellTrace and transplanted into secondary

310 recipients. Leukemia was harvested twelve days later and CellTrace levels were

311 assessed in LSC subgroups by flow cytometry. **B,** Primary human AML bone

312 marrow samples were obtained at diagnosis. **1.** AMLs and normal bone marrow

313 mononuclear cells were sorted to isolate CD34+CD38- cells (immunophenotypic

314 LSCs) and submitted for single-cell capture and qPCR. **2.** An AML sample was

315 CD34+ selected to enrich for LSCs and submitted for single cell capture and RNA

316 sequencing. **3.** CyTOF was used to measure the levels of Ki67 (proliferation

317 maker) in CD36<sup>High</sup> and CD69<sup>High</sup> subpopulations of AML bone marrow samples

318 obtained at diagnosis.

319

## A Experimental workflow: murine AML

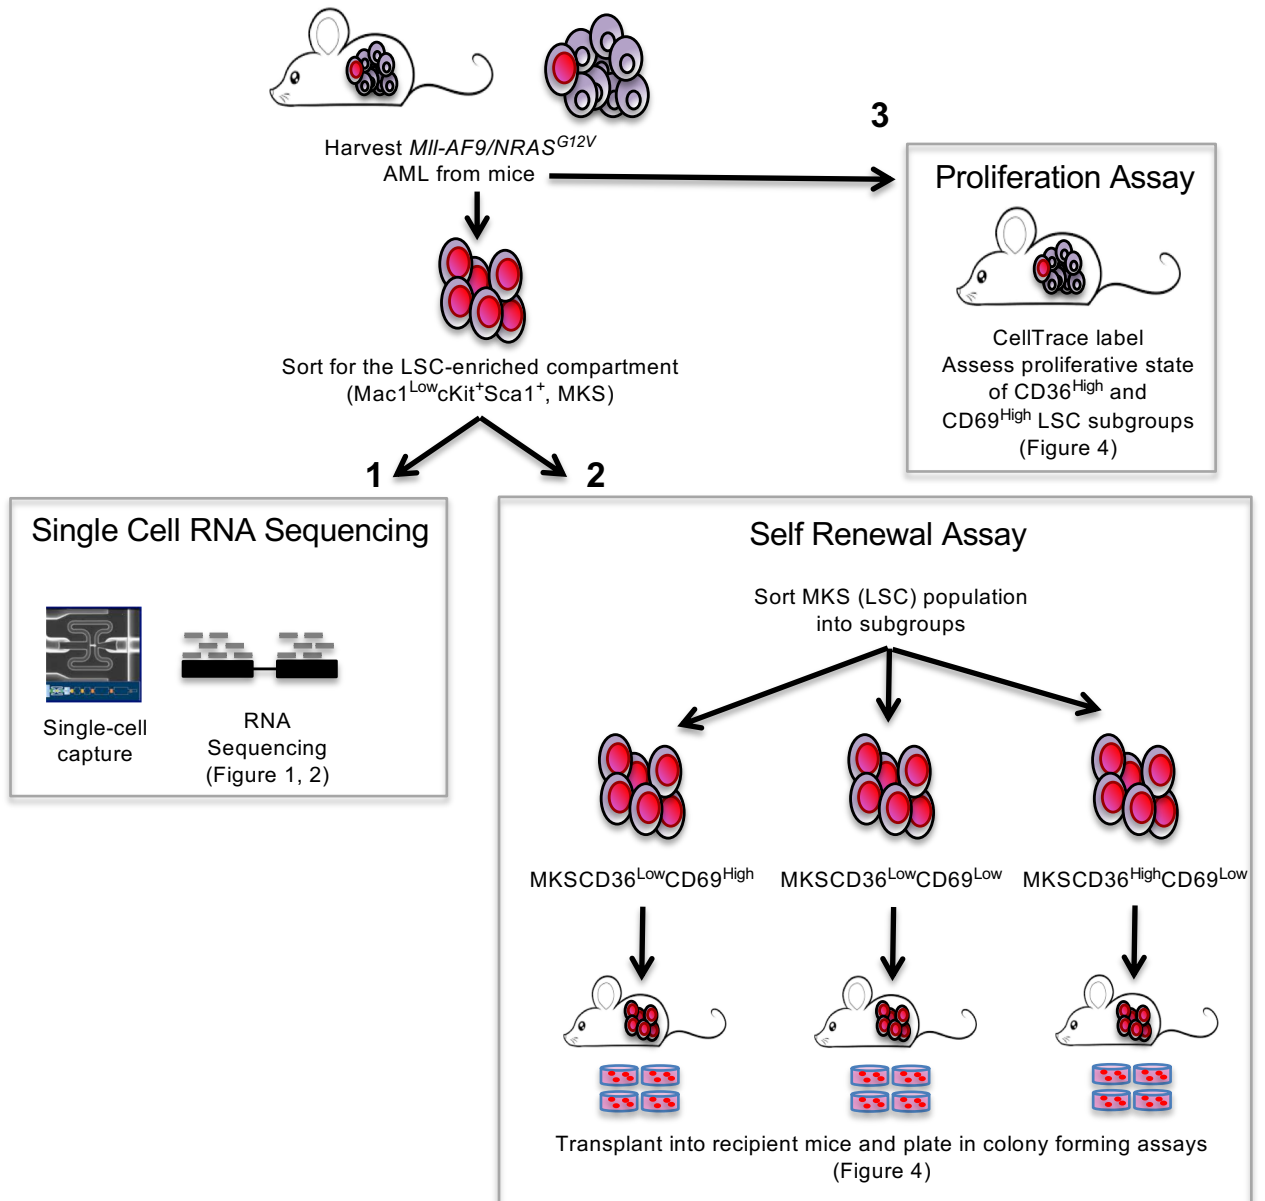

## B Experimental workflow: human AML

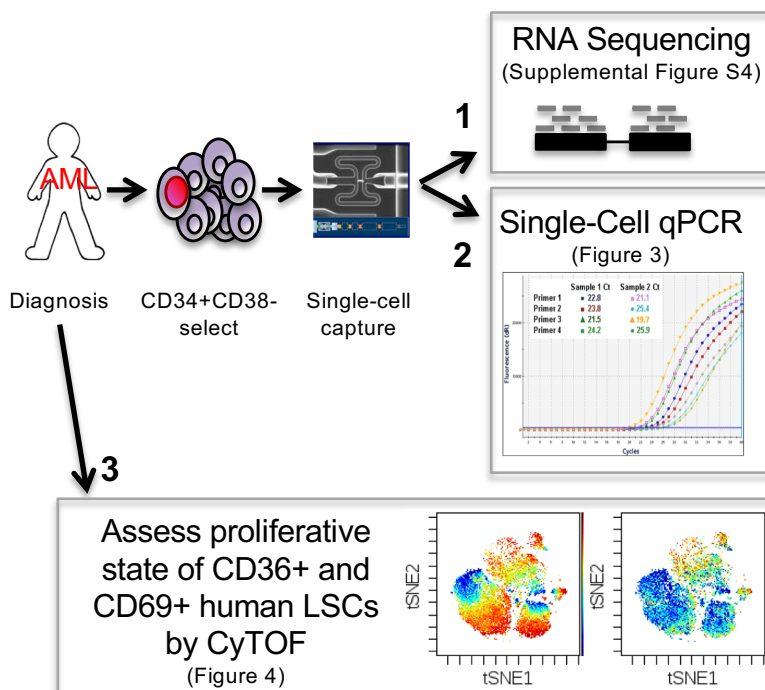



327 **Supplementary Figure S2.** Cell surface markers delineate LSC subgroups. **A-C,**  
328 Single-cell normalized expression levels (Fragments Per Kilobase of transcript  
329 per Million mapped reads, FPKM) of **A, *Cd69*, B, *Cd36* C, *Vav1*** by transcriptional  
330 subgroups in cells pooled from the discovery and validation datasets (single-cell  
331 RNA sequencing data of murine LSCs). **D,** Single-cell FPKM expression values  
332 of *Cd69* and *Cd36* in Ras-off LSCs.

333

334

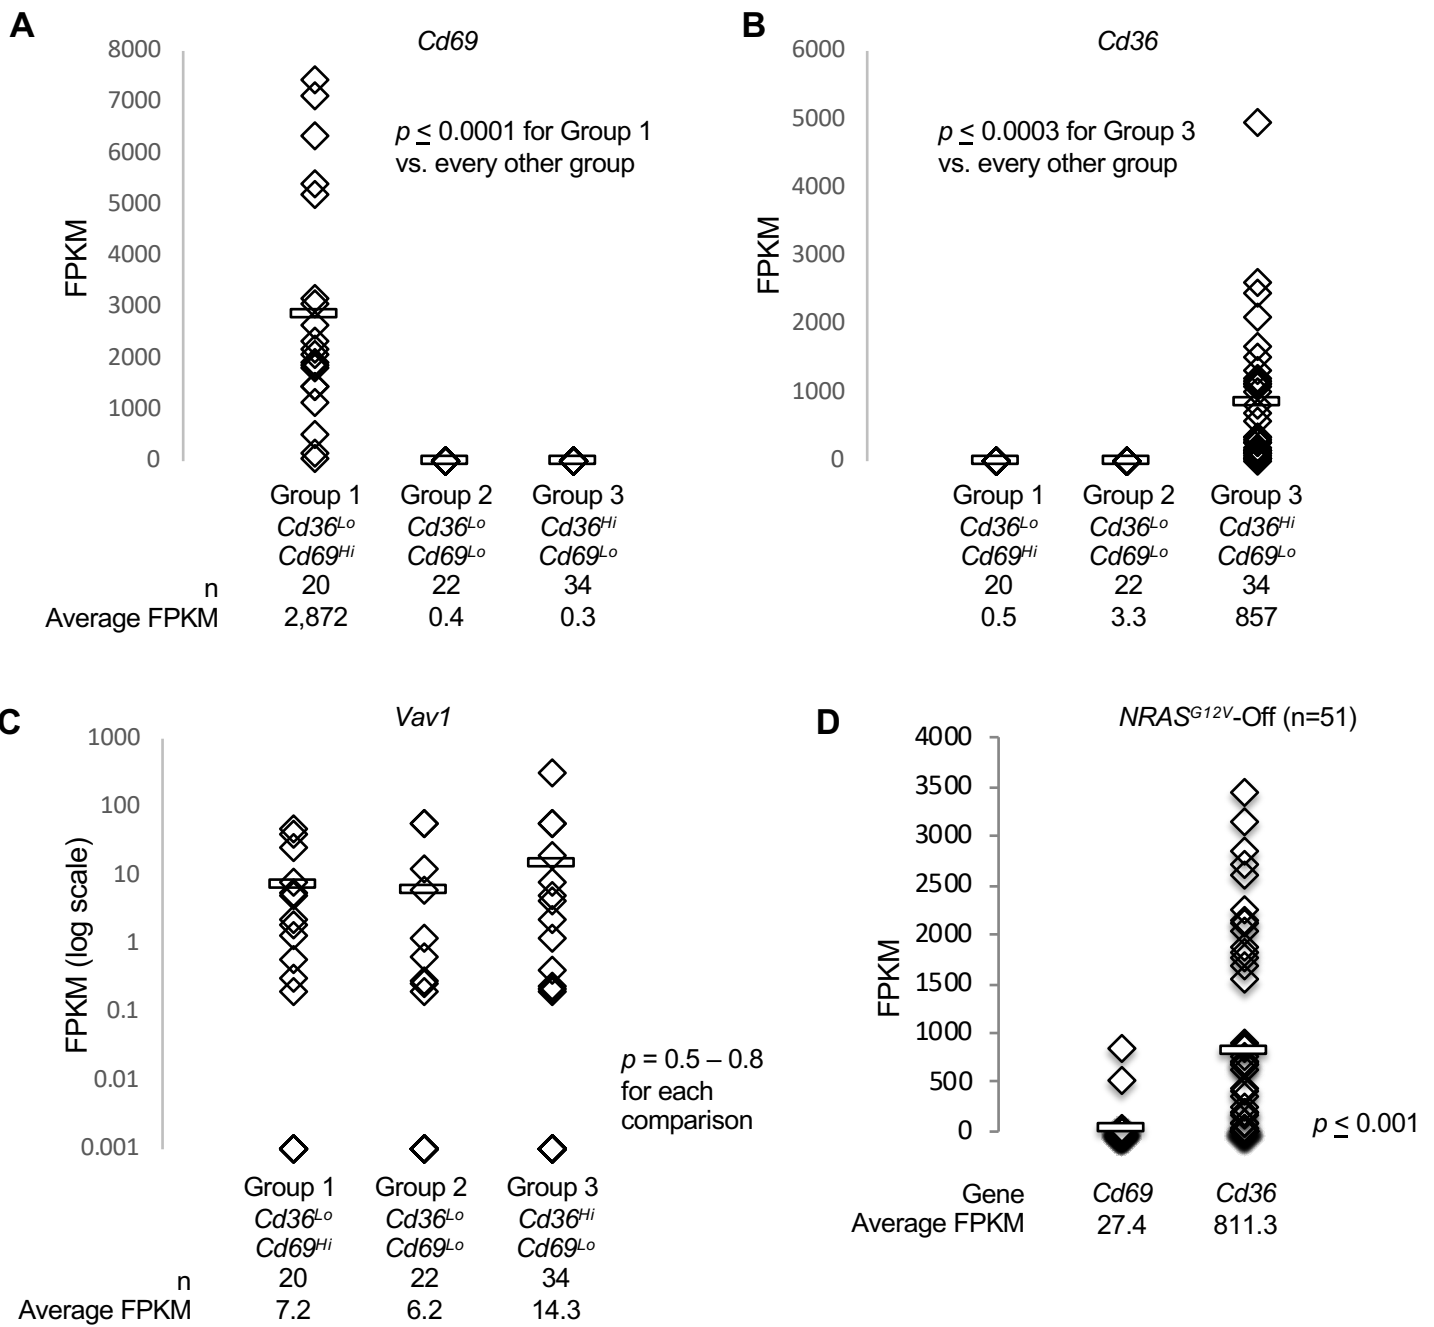

336 **Supplementary Figure S3.** HSPC markers in the murine data and *Cd69* and  
337 *Cd36* are expressed in different stages of early hematopoiesis. **A**, Expression of  
338 gene encoding hematopoietic cell surface markers in our single-cell murine  
339 dataset (data pooled from both the validation and discovery datasets). **B-G** *Cd69*  
340 and *Cd36* expression in normal mouse LT-HSCs, HSPCs, and progenitors per  
341 the Nestorowa et al. map of mouse single-cell transcriptional profiles. **B-D**,  
342 Average normalized expression values of *Cd36* and *Cd69* in each compartment  
343 is **B**, listed and **C-D**, shown. **E-G**, Normalized expression of *Cd36* plotted against  
344 *Cd69* in the single-cell transcriptional data. **E**, Progenitors (n=798), **F**, HSPCs  
345 (n=701), **G**, LT-HSCs (n=155).

346

347

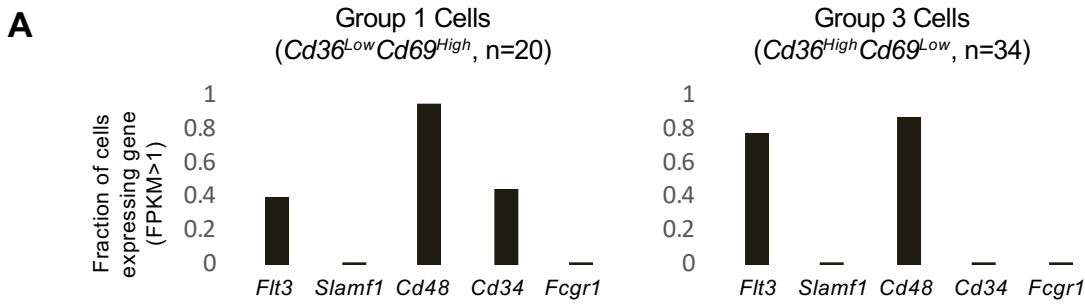

**B**

|                     | Average Expression |             | Fold Change               |              |
|---------------------|--------------------|-------------|---------------------------|--------------|
|                     | <i>Cd69</i>        | <i>Cd36</i> | <i>Cd69</i> / <i>Cd36</i> |              |
| Progenitors (n=798) | 2.27               | 0.99        | 2.3                       | $p < 0.0001$ |
| HSPCs (n=701)       | 2.85               | 0.40        | 7.1                       | $p < 0.0001$ |
| LT-HSCs (n=155)     | 1.23               | 0.57        | 2.2                       | $p = 0.0023$ |

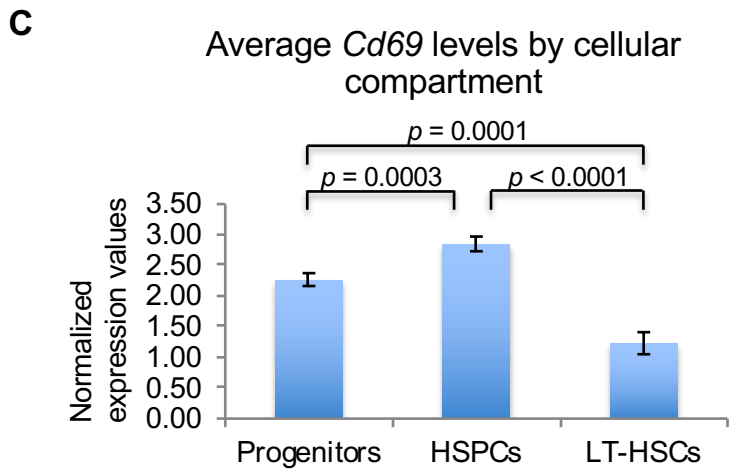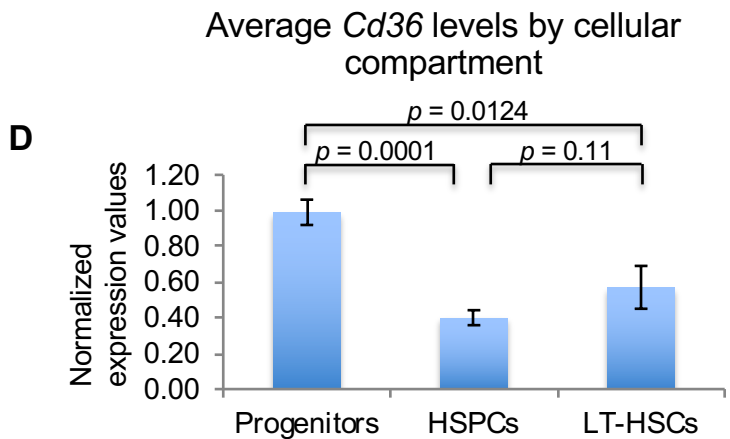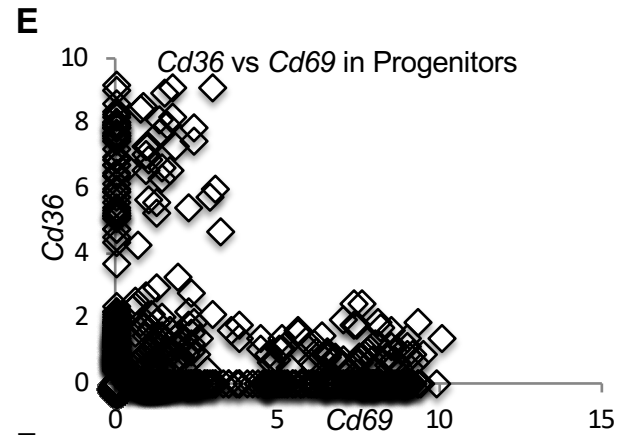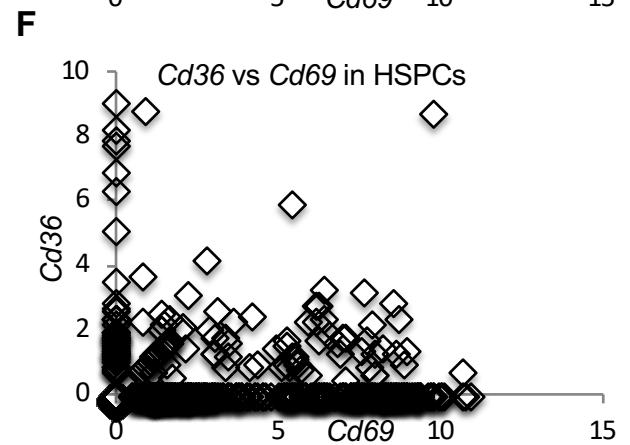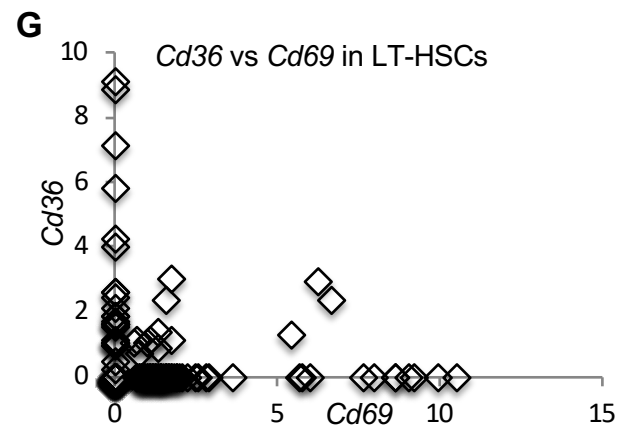

349 **Supplementary Figure S4.**

350 Primary human AML stem and progenitor cells recapitulate features of the single-  
351 cell gene expression patterns of murine *Mll-AF9/NRAS<sup>G12V</sup>* AML. A diagnostic  
352 bone marrow aspirate from a patient with AML (sample a2, Supplementary  
353 Tables S3-4) was CD34+ selected and submitted for single-cell capture and  
354 whole transcriptome RNA sequencing. **A**, Schematic of experimental workflow. A  
355 bone aspirate sample was obtained from a patient with AML at diagnosis. CD34+  
356 cells were isolated from the aspirate using magnetic beads and submitted for  
357 single-cell capture (C1, Fluidigm) and whole transcriptome RNA sequencing.  
358 Outlier analysis was performed per SINGuLAR (Fluidigm) to omit outliers,  
359 remaining (non-outlier) cells were used for analysis. Cells (n=25) had a mean of  
360 911 expressed genes per cell, range of expressed genes/cell=238-2053. **B**,  
361 Heatmap shows unsupervised, two-dimensional hierarchical clustering of the  
362 differentially expressed genes within this dataset. **C**, Ingenuity Pathway Analysis  
363 and Upstream Regulators Analysis was performed on differentially expressed  
364 genes within the human single-cell RNA sequencing dataset. **D-E**, The gene  
365 expression of each CD34+CD38-AML sample (as measured by single-cell qPCR)  
366 was compared to that of the pooled CD34+CD38- normal bone marrow samples  
367 and the pooled CD34+CD38- AML samples. The Kolmogorov-Smirnoff test was  
368 used to assess the degree of divergence of each AML sample from the reference  
369 distribution (using either the pooled normal bone marrow or the pooled AML  
370 samples as the reference distribution). The pooled AML reference distribution  
371 was generated by excluding the AML sample being tested for each analysis

367 (such that each sample is tested against the pooled AML samples, but excluding  
368 itself). **D**, The graph represents the cumulative distribution function for a  
369 representative gene. The red line represents the cumulative distribution function  
370 of all normal bone marrow samples (pooled). The black line represents all of the  
371 AML samples (pooled). The blue lines represent individual AML samples for  
372 which this gene passed quality control. **E**, The percentage of genes whose  
373 expression deviates from the normal samples (with a  $p < 0.05$ ) is displayed for  
374 each AML sample. The average percentage of deviation of all AML samples from  
375 the normal distribution is displayed as a bar.

376  
377

378

379

**A** Single cell RNA sequencing of diagnostic human AML workflow

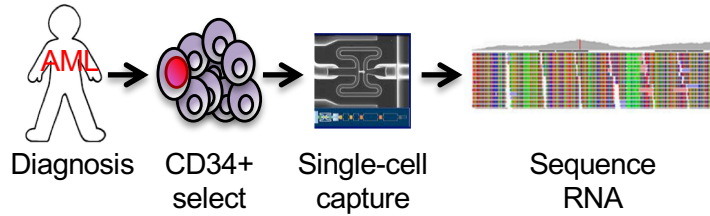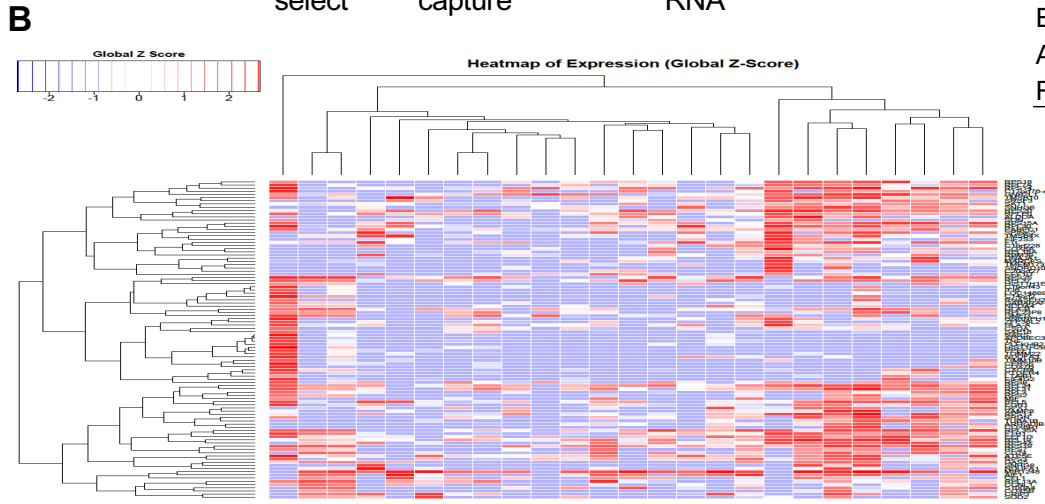

**C**

| Ingenuity Pathway Analysis |                      |
|----------------------------|----------------------|
| Top Pathways               | p value              |
| Hematological Development  | $8.8 \times 10^{-7}$ |
| Cell Death and Survival    | $3.3 \times 10^{-8}$ |
| Top Upstream Regulators    |                      |
| Top Upstream Regulators    | p-value              |
| ERK                        | 0.002                |
| AKT                        | 0.003                |
| RAS                        | 0.002                |

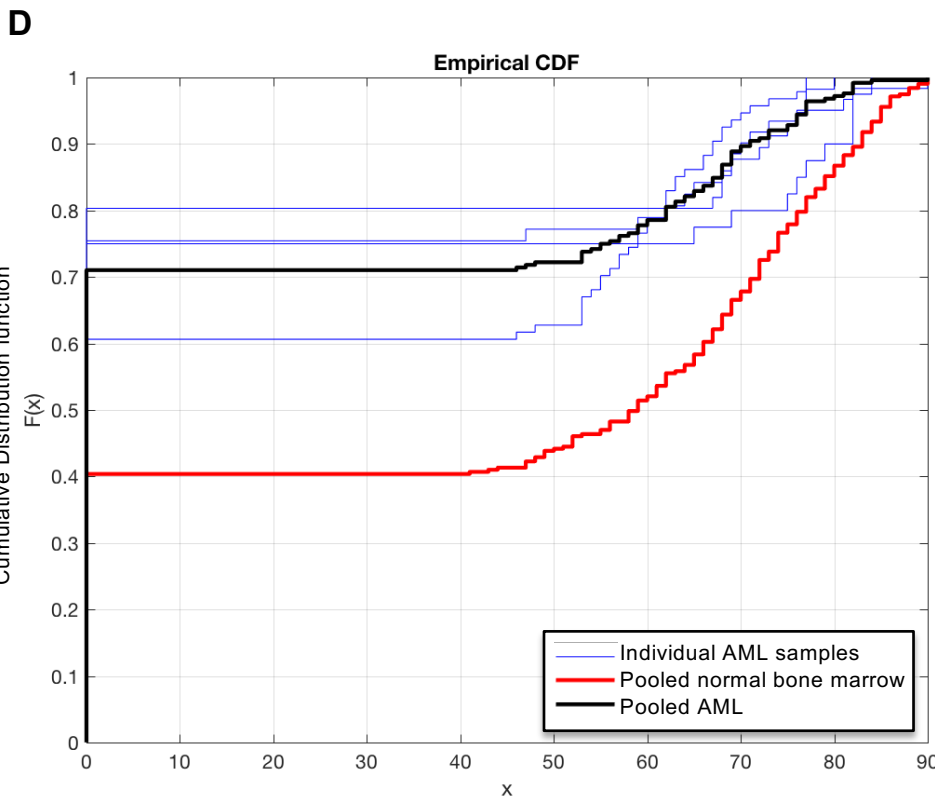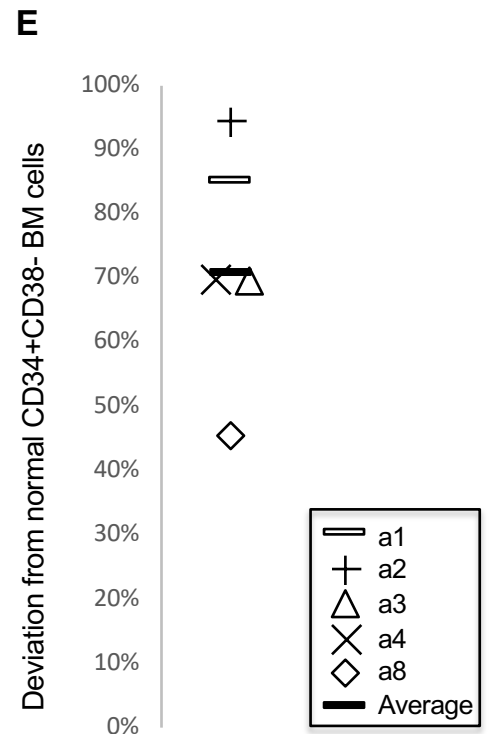

Deviation of each AML sample relative to the normal bone marrow reference distribution compared to the deviation of each AML sample relative to the AML reference distribution :  $p < 0.0003$

386 **Supplementary Figure S5**

387 Sorting strategy for murine AML for *in vivo* leukemia reconstitution assays and *in*  
388 *vitro* colony forming assays. Within the Mac1<sup>Low</sup>Kit+Sca1+ LSC-enriched  
389 subpopulation, CD36<sup>High</sup>CD69<sup>Low</sup>, CD36<sup>Low</sup>CD69<sup>Low</sup>, CD36<sup>Low</sup>CD69<sup>High</sup>, and  
390 CD36<sup>High</sup>CD69<sup>High</sup> compartments were isolated.

391

392



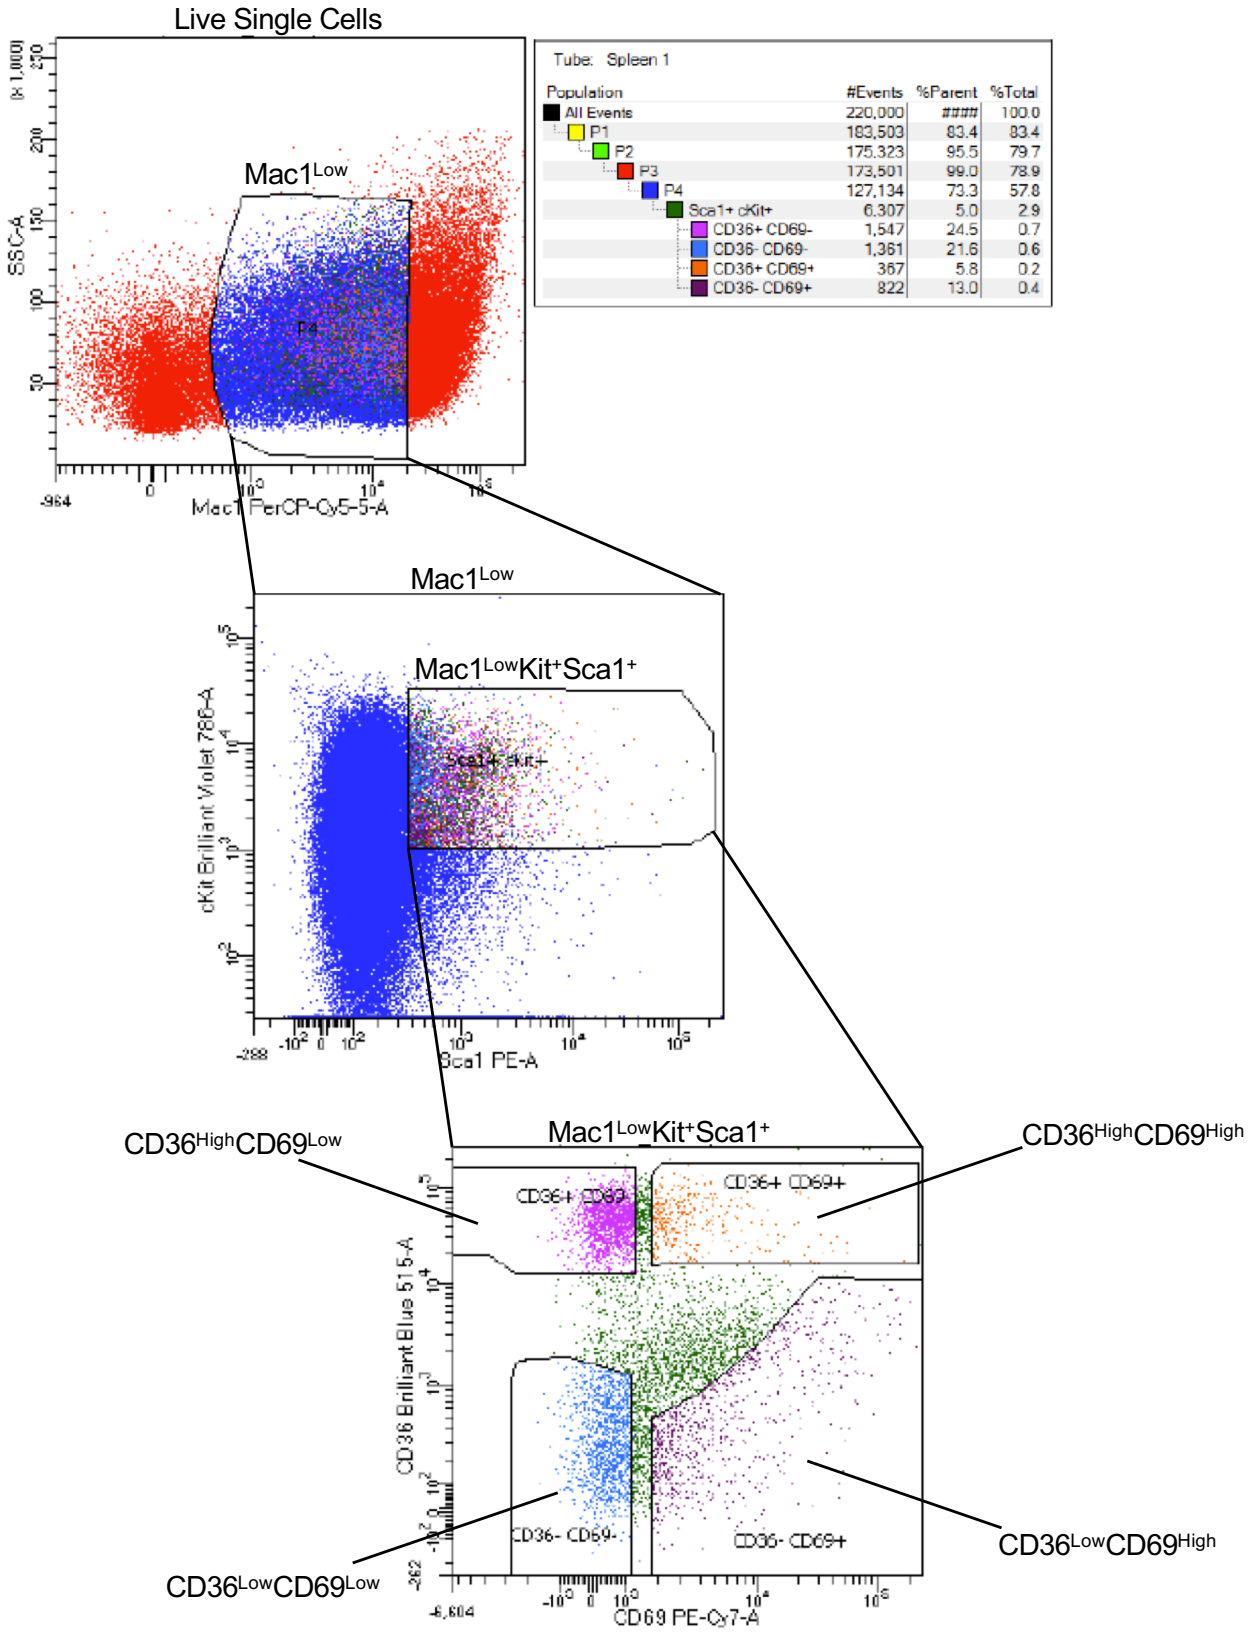

394 **Supplementary Figure S6**

395 Post sort assessments. The purity of CD36<sup>High</sup>CD69<sup>Low</sup>, CD36<sup>Low</sup>CD69<sup>Low</sup>,  
396 CD36<sup>Low</sup>CD69<sup>High</sup>, and CD36<sup>High</sup>CD69<sup>High</sup> compartments within the  
397 Mac1<sup>Low</sup>Kit+Sca1+ LSC-enriched subpopulation was assessed after sorting.

398

399

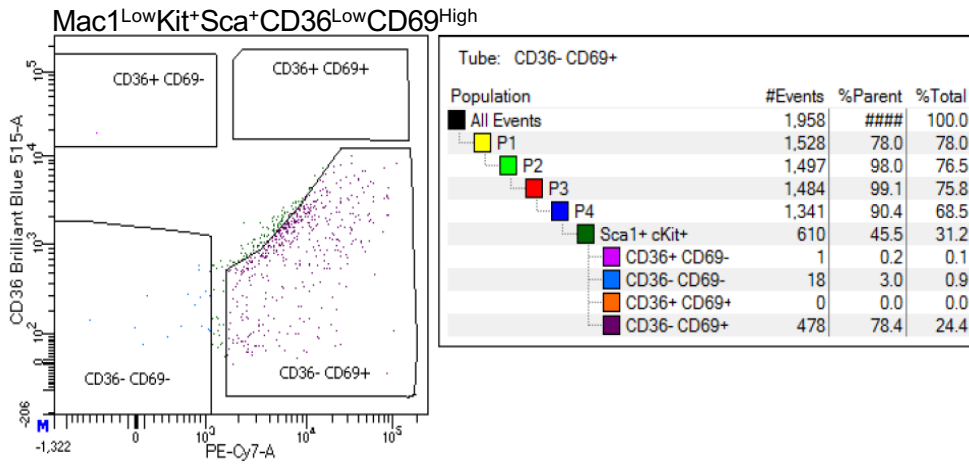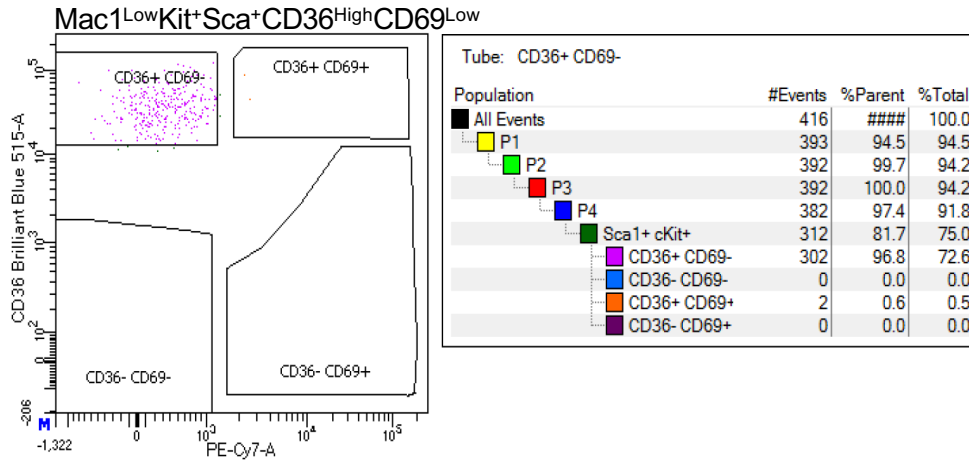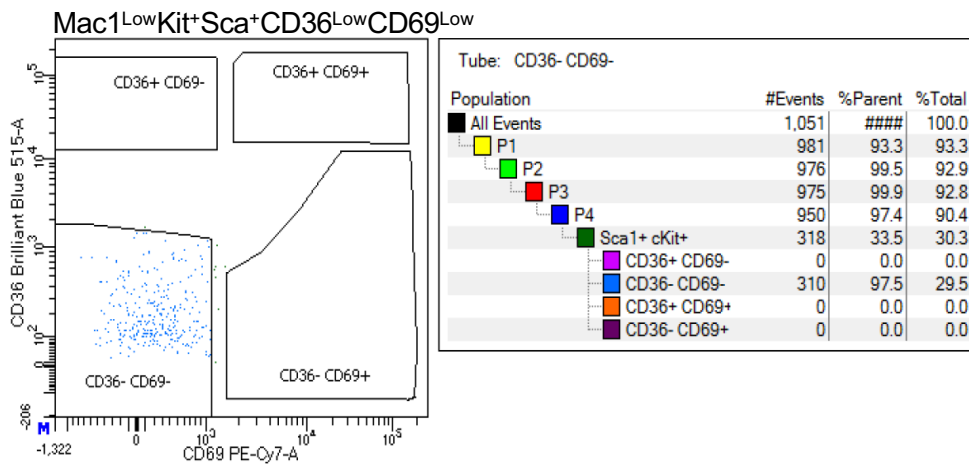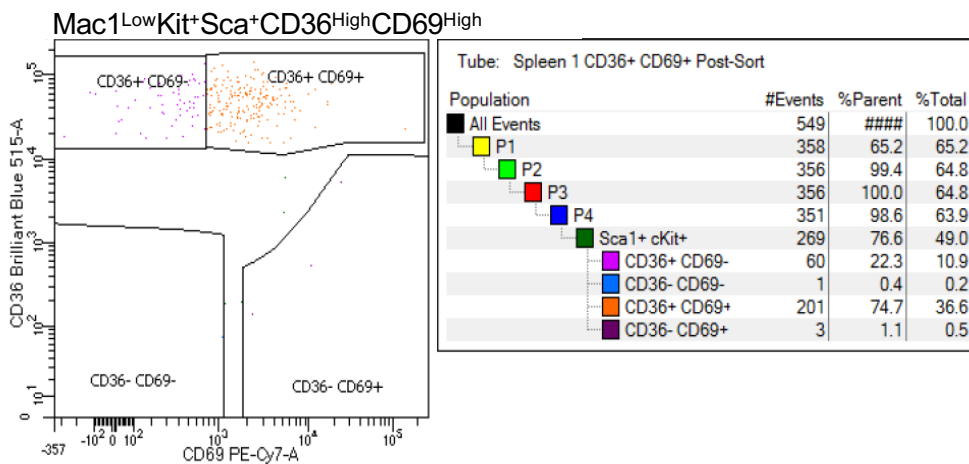

401 **Supplementary Figure S7**

402 The viability of leukemic subpopulations and immunophenotype of transplanted  
403 leukemias. **A**, The viability of murine AML subpopulations was assessed by  
404 staining cells with immunophenotypic markers and a dead cell exclusion dye and  
405 analyzing by flow cytometry. **B-C**, The immunophenotype of leukemias that  
406 developed in mice transplanted with MKSCD36<sup>Low</sup>CD69<sup>High</sup> cells,  
407 MKSCD36<sup>Low</sup>CD69<sup>Low</sup> cells, or unsorted leukemia cells is **B**, displayed in  
408 representative plots and **C**, quantitated.

409

410

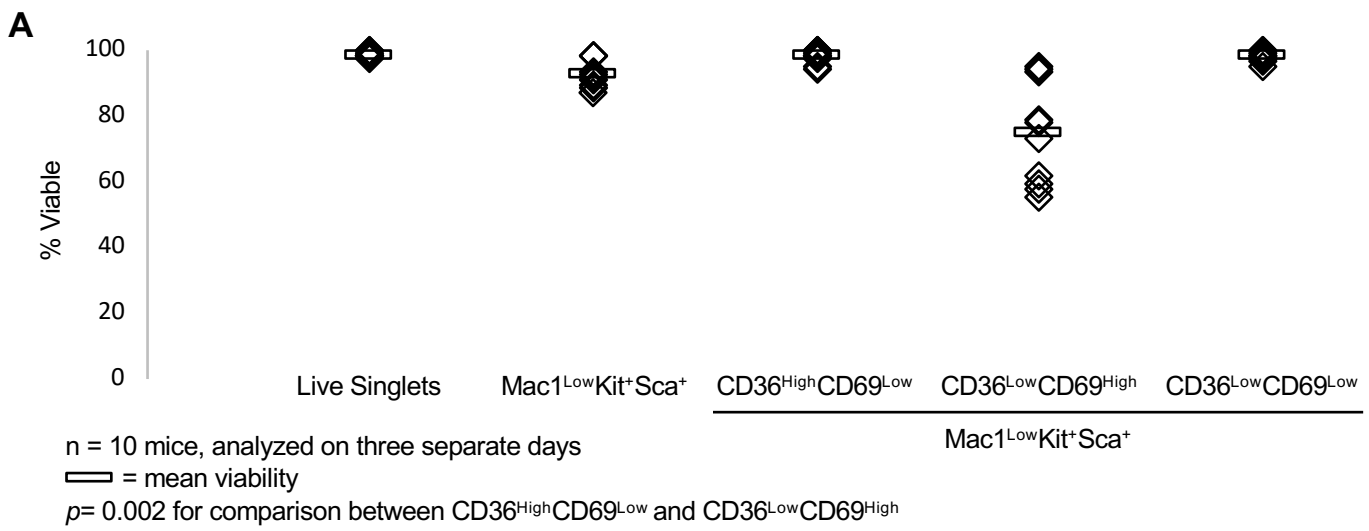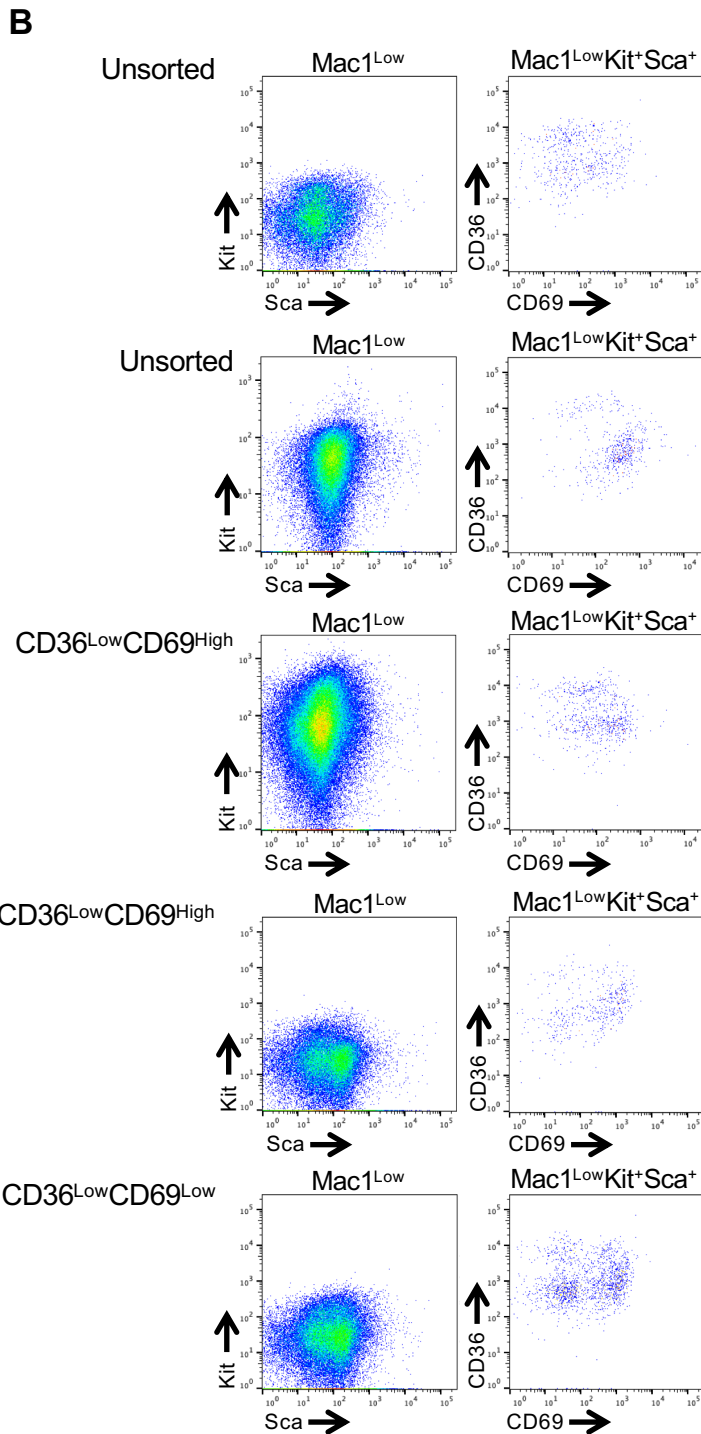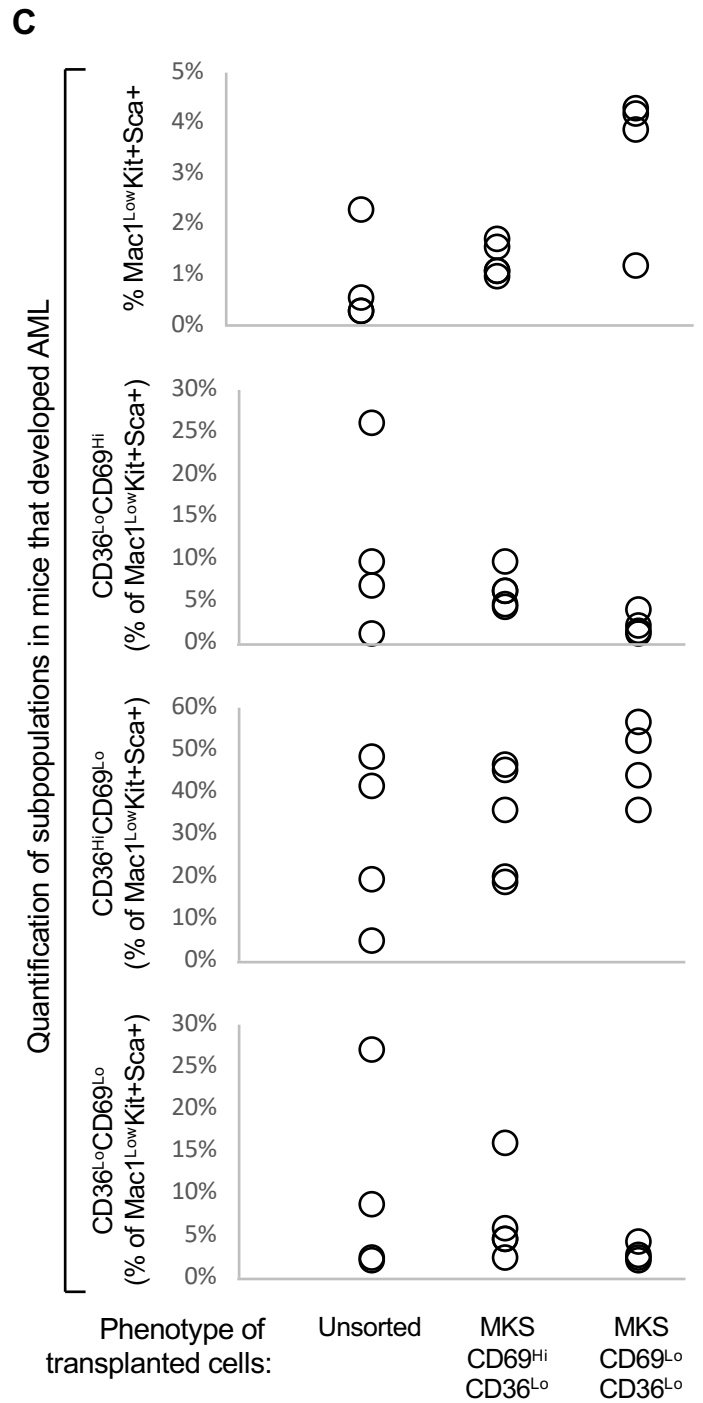

Supplementary Figure S7

407 **Supplementary Figure S8**

408 CD36 and CD69 expression in human AML subpopulations. Mass cytometry  
409 (CyTOF) was used to assess the expression of CD36 and CD69 in CD34+CD38-  
410 and unselected cells in a panel of nine primary human AML samples. The  
411 percentage of cells expressing Ki67% in CD36<sup>High</sup>CD69<sup>Low</sup> or CD36<sup>Low</sup>CD69<sup>High</sup>  
412 cells within unselected leukemia cells or within the CD34+CD38- population is  
413 displayed. Some samples had insufficient CD36+ or CD69+ cells within the  
414 CD34+CD38- compartment to assess Ki67%.

415

416

417

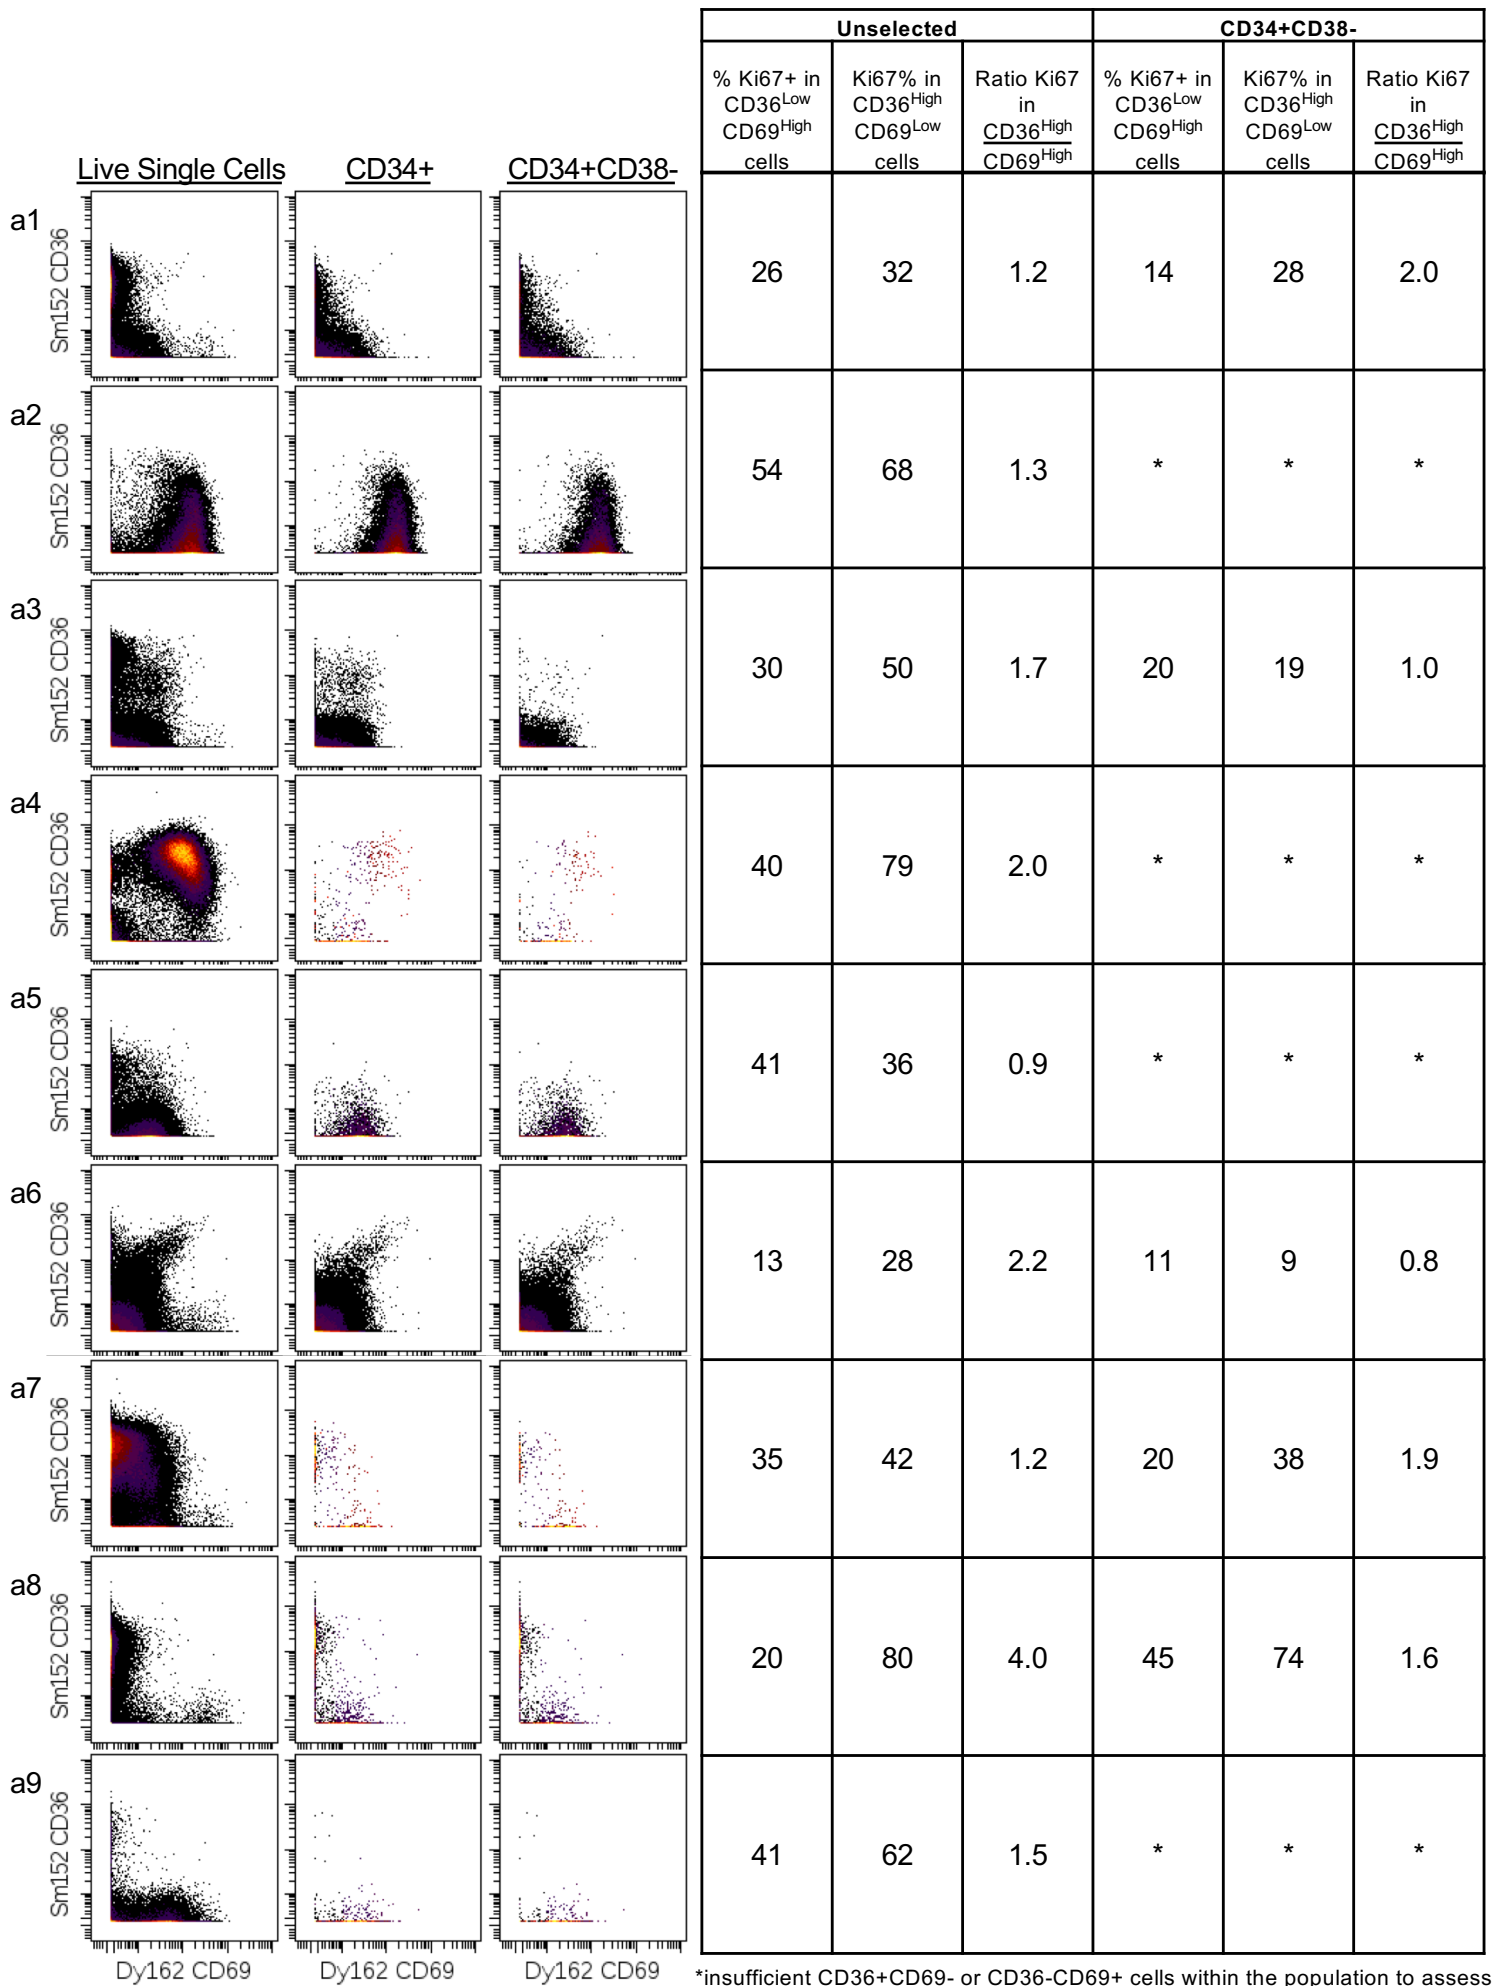

\*insufficient CD36+CD69- or CD36-CD69+ cells within the population to assess
